# Supplementary material for: Evidence for More than One Parkinson's Disease-Associated Variant within the HLA Region
Source: PubMed Central journal article supplement (PMC3212531; doi:10.1371/journal.pone.0027109), 2011-11-09
Supplement: pone.0027109.s001.pdf [file pone.0027109.s001.pdf]

**Table S1. Step-wise conditional analysis including 107 HLA SNPs that achieved  $P < 10^{-3}$  in GWAS.**

In this Table, odds ratios (OR) were calculated by comparing the minor allele to the major allele. (In the Tables of the main text, the ORs were calculated comparing the risk allele to the alternate allele in order to keep all OR in the text consistently in the positive direction. Tests were adjusted for age at enrollment, sex, and PC1 and PC2 (principal components that define Jewish/non-Jewish origin and the European country of ancestry).

| SNP         | BP         | Minor/<br>Major<br>Alleles | MAF<br>cases | MAF<br>controls | HWE<br>P | Unconditioned<br>(GWAS results) |      | Conditioned<br>on SNP1               |      | Conditioned<br>on SNP1 &<br>SNP2 |      | Conditioned<br>on SNP1 &<br>SNP2 &<br>SNP3 |      |              |
|-------------|------------|----------------------------|--------------|-----------------|----------|---------------------------------|------|--------------------------------------|------|----------------------------------|------|--------------------------------------------|------|--------------|
|             |            |                            |              |                 |          | OR                              | P    | OR                                   | P    | OR                               | P    | OR                                         | P    |              |
| <b>SNP1</b> | rs3129882  | 32517508                   | G/A          | 0.46            | 0.40     | 0.82                            | 1.31 | <b><math>3 \times 10^{-8}</math></b> |      |                                  |      |                                            |      |              |
| <b>SNP2</b> | rs3993757  | 31698725                   | T/C          | 0.03            | 0.02     | 1.00                            | 1.79 | $7 \times 10^{-4}$                   | 1.70 | <b>0.002</b>                     |      |                                            |      |              |
| <b>SNP3</b> | rs2844505  | 31547042                   | G/A          | 0.29            | 0.25     | 0.01                            | 1.23 | $9 \times 10^{-5}$                   | 1.15 | <b>0.011</b>                     | 1.16 | <b>0.006</b>                               |      |              |
| <b>SNP4</b> | rs9268515  | 32487273                   | C/G          | 0.16            | 0.20     | 0.33                            | 0.80 | $4 \times 10^{-4}$                   | 0.88 | <b>0.049</b>                     | 0.86 | <b>0.028</b>                               | 0.86 | <b>0.025</b> |
|             | rs3117098  | 32466491                   | C/T          | 0.33            | 0.28     | 0.74                            | 1.27 | $3 \times 10^{-6}$                   | 1.06 | 0.455                            | 1.05 | 0.540                                      | 1.01 | 0.889        |
|             | rs3129955  | 32473818                   | T/C          | 0.33            | 0.28     | 0.79                            | 1.27 | $4 \times 10^{-6}$                   | 1.05 | 0.501                            | 1.04 | 0.591                                      | 1.01 | 0.951        |
|             | rs3117102  | 32458085                   | G/A          | 0.33            | 0.28     | 0.77                            | 1.27 | $4 \times 10^{-6}$                   | 1.05 | 0.509                            | 1.04 | 0.600                                      | 1.00 | 0.962        |
|             | rs3129954  | 32473558                   | A/G          | 0.33            | 0.28     | 0.68                            | 1.27 | $4 \times 10^{-6}$                   | 1.05 | 0.509                            | 1.04 | 0.599                                      | 1.00 | 0.964        |
|             | rs3117104  | 32456287                   | A/T          | 0.33            | 0.28     | 0.77                            | 1.27 | $4 \times 10^{-6}$                   | 1.05 | 0.505                            | 1.04 | 0.596                                      | 1.00 | 0.957        |
|             | rs3129948  | 32462622                   | C/A          | 0.33            | 0.28     | 0.74                            | 1.27 | $4 \times 10^{-6}$                   | 1.05 | 0.536                            | 1.04 | 0.629                                      | 1.00 | 0.990        |
|             | rs6923504  | 32536164                   | G/C          | 0.33            | 0.29     | 0.42                            | 1.24 | $3 \times 10^{-5}$                   | 1.03 | 0.643                            | 1.01 | 0.855                                      | 0.99 | 0.843        |
|             | rs6903608  | 32536263                   | C/T          | 0.33            | 0.29     | 0.44                            | 1.24 | $3 \times 10^{-5}$                   | 1.03 | 0.647                            | 1.01 | 0.859                                      | 0.99 | 0.838        |
|             | rs9268880  | 32539336                   | T/G          | 0.34            | 0.29     | 0.32                            | 1.23 | $4 \times 10^{-5}$                   | 1.03 | 0.684                            | 1.01 | 0.896                                      | 0.98 | 0.804        |
|             | rs9268882  | 32539601                   | T/C          | 0.34            | 0.29     | 0.32                            | 1.23 | $4 \times 10^{-5}$                   | 1.03 | 0.684                            | 1.01 | 0.896                                      | 0.98 | 0.804        |
|             | rs9269110  | 32551247                   | A/C          | 0.33            | 0.29     | 0.32                            | 1.23 | $5 \times 10^{-5}$                   | 1.03 | 0.714                            | 1.01 | 0.928                                      | 0.98 | 0.768        |
|             | rs2050188  | 32447875                   | G/A          | 0.37            | 0.32     | 0.81                            | 1.22 | $5 \times 10^{-5}$                   | 0.99 | 0.904                            | 0.99 | 0.845                                      | 0.96 | 0.554        |
|             | rs9275578  | 32787362                   | T/G          | 0.20            | 0.24     | 0.78                            | 0.80 | $1 \times 10^{-4}$                   | 0.90 | 0.111                            | 0.90 | 0.092                                      | 0.89 | 0.058        |
|             | rs9275593  | 32788821                   | A/G          | 0.20            | 0.24     | 0.78                            | 0.80 | $1 \times 10^{-4}$                   | 0.90 | 0.111                            | 0.90 | 0.092                                      | 0.89 | 0.058        |
|             | rs28435656 | 31988616                   | A/G          | 0.19            | 0.16     | 1.00                            | 1.28 | $1 \times 10^{-4}$                   | 1.15 | <b>0.043</b>                     | 1.17 | 0.023                                      | 1.09 | 0.283        |
|             | rs9275582  | 32788048                   | T/C          | 0.20            | 0.24     | 0.78                            | 0.80 | $1 \times 10^{-4}$                   | 0.90 | 0.111                            | 0.90 | 0.092                                      | 0.89 | 0.058        |
|             | rs9275579  | 32787437                   | A/T          | 0.21            | 0.24     | 0.85                            | 0.80 | $1 \times 10^{-4}$                   | 0.90 | 0.106                            | 0.90 | 0.090                                      | 0.89 | 0.061        |
|             | rs3957145  | 32786325                   | A/G          | 0.21            | 0.24     | 0.89                            | 0.81 | $2 \times 10^{-4}$                   | 0.91 | 0.114                            | 0.90 | 0.097                                      | 0.89 | 0.063        |
|             | rs9275595  | 32789333                   | C/T          | 0.20            | 0.24     | 0.75                            | 0.80 | $2 \times 10^{-4}$                   | 0.91 | 0.124                            | 0.90 | 0.103                                      | 0.89 | 0.066        |
|             | rs3129768  | 32703061                   | G/T          | 0.21            | 0.17     | 0.33                            | 1.26 | $2 \times 10^{-4}$                   | 1.08 | 0.310                            | 1.10 | 0.200                                      | 1.04 | 0.598        |
|             | rs2395163  | 32495787                   | C/T          | 0.19            | 0.23     | 0.05                            | 0.80 | $2 \times 10^{-4}$                   | 0.90 | 0.094                            | 0.89 | 0.065                                      | 0.88 | 0.051        |
|             | rs9271640  | 32700178                   | T/C          | 0.21            | 0.18     | 0.33                            | 1.26 | $2 \times 10^{-4}$                   | 1.07 | 0.326                            | 1.09 | 0.214                                      | 1.04 | 0.631        |
|             | rs9275523  | 32782972                   | A/C          | 0.21            | 0.24     | 0.86                            | 0.81 | $2 \times 10^{-4}$                   | 0.91 | 0.118                            | 0.90 | 0.100                                      | 0.89 | 0.066        |
|             | rs9275580  | 32787440                   | G/A          | 0.21            | 0.24     | 0.89                            | 0.81 | $2 \times 10^{-4}$                   | 0.91 | 0.119                            | 0.90 | 0.101                                      | 0.89 | 0.066        |
|             | rs7197     | 32520558                   | T/C          | 0.19            | 0.16     | 0.79                            | 1.27 | $2 \times 10^{-4}$                   | 1.07 | 0.381                            | 1.09 | 0.261                                      | 1.04 | 0.648        |
|             | rs9268543  | 32492779                   | T/A          | 0.14            | 0.18     | 0.23                            | 0.78 | $2 \times 10^{-4}$                   | 0.87 | 0.052                            | 0.86 | <b>0.030</b>                               | 0.86 | <b>0.026</b> |
|             | rs2844508  | 31544478                   | C/G          | 0.34            | 0.31     | 0.74                            | 1.21 | $2 \times 10^{-4}$                   | 1.14 | <b>0.012</b>                     | 1.16 | <b>0.006</b>                               | 1.07 | 0.519        |
|             | rs9275522  | 32782948                   | T/C          | 0.21            | 0.24     | 0.89                            | 0.81 | $2 \times 10^{-4}$                   | 0.91 | 0.129                            | 0.90 | 0.110                                      | 0.89 | 0.072        |
|             | rs9268627  | 32513799                   | C/T          | 0.19            | 0.23     | 0.02                            | 0.80 | $2 \times 10^{-4}$                   | 0.90 | 0.121                            | 0.89 | 0.086                                      | 0.89 | 0.066        |
|             | rs9275555  | 32785066                   | T/C          | 0.21            | 0.24     | 0.52                            | 0.81 | $2 \times 10^{-4}$                   | 0.91 | 0.139                            | 0.91 | 0.120                                      | 0.89 | 0.079        |
|             | rs3130283  | 32246523                   | A/C          | 0.16            | 0.13     | 0.45                            | 1.28 | $3 \times 10^{-4}$                   | 1.12 | 0.125                            | 1.14 | 0.075                                      | 1.05 | 0.533        |
|             | rs9269081  | 32549078                   | A/C          | 0.32            | 0.28     | 0.55                            | 1.21 | $3 \times 10^{-4}$                   | 1.00 | 0.951                            | 0.98 | 0.744                                      | 0.95 | 0.479        |
|             | rs17577980 | 32467799                   | A/G          | 0.11            | 0.08     | 0.13                            | 1.34 | $3 \times 10^{-4}$                   | 1.16 | 0.091                            | 1.16 | 0.096                                      | 1.17 | 0.071        |
|             | rs7452864  | 32547055                   | T/C          | 0.32            | 0.28     | 0.55                            | 1.21 | $3 \times 10^{-4}$                   | 0.99 | 0.922                            | 0.98 | 0.717                                      | 0.95 | 0.460        |
|             | rs3130279  | 32220604                   | A/G          | 0.16            | 0.13     | 0.38                            | 1.27 | $3 \times 10^{-4}$                   | 1.12 | 0.120                            | 1.14 | 0.076                                      | 1.05 | 0.560        |
|             | rs3130287  | 32158522                   | C/T          | 0.16            | 0.13     | 0.32                            | 1.27 | $3 \times 10^{-4}$                   | 1.12 | 0.107                            | 1.14 | 0.067                                      | 1.05 | 0.539        |
|             | rs2507964  | 31566136                   | A/G          | 0.31            | 0.34     | 0.13                            | 0.83 | $3 \times 10^{-4}$                   | 0.88 | <b>0.015</b>                     | 0.89 | <b>0.026</b>                               | 0.93 | 0.221        |
|             | rs2395175  | 32513004                   | A/G          | 0.15            | 0.19     | 0.21                            | 0.79 | $3 \times 10^{-4}$                   | 0.88 | 0.072                            | 0.87 | 0.044                                      | 0.86 | 0.036        |
|             | rs9264532  | 31342360                   | C/T          | 0.34            | 0.30     | 0.02                            | 1.20 | $3 \times 10^{-4}$                   | 1.12 | <b>0.030</b>                     | 1.13 | <b>0.024</b>                               | 1.06 | 0.349        |
|             | rs3129888  | 32519704                   | G/A          | 0.21            | 0.19     | 0.35                            | 1.24 | $4 \times 10^{-4}$                   | 1.04 | 0.644                            | 1.06 | 0.467                                      | 1.01 | 0.927        |
|             | rs3998158  | 32789970                   | C/T          | 0.19            | 0.23     | 0.50                            | 0.81 | $4 \times 10^{-4}$                   | 0.91 | 0.159                            | 0.91 | 0.133                                      | 0.89 | 0.085        |
|             | rs7382085  | 32522398                   | G/A          | 0.24            | 0.20     | 0.71                            | 1.23 | $4 \times 10^{-4}$                   | 1.02 | 0.817                            | 1.04 | 0.596                                      | 0.99 | 0.915        |
|             | rs3134954  | 32179871                   | G/A          | 0.16            | 0.13     | 0.29                            | 1.27 | $4 \times 10^{-4}$                   | 1.12 | 0.122                            | 1.14 | 0.078                                      | 1.05 | 0.584        |
|             | rs2516415  | 31567721                   | T/C          | 0.31            | 0.34     | 0.11                            | 0.83 | $4 \times 10^{-4}$                   | 0.88 | <b>0.015</b>                     | 0.89 | <b>0.028</b>                               | 0.93 | 0.225        |
|             | rs9268628  | 32513843                   | C/A          | 0.18            | 0.15     | 0.002                           | 1.25 | $4 \times 10^{-4}$                   | 1.06 | 0.432                            | 1.03 | 0.651                                      | 1.07 | 0.388        |
|             | rs2395153  | 32453573                   | G/C          | 0.37            | 0.41     | 0.37                            | 0.84 | $4 \times 10^{-4}$                   | 0.97 | 0.566                            | 0.96 | 0.511                                      | 0.96 | 0.494        |
|             | rs9268435  | 32454469                   | A/G          | 0.37            | 0.41     | 0.39                            | 0.84 | $4 \times 10^{-4}$                   | 0.97 | 0.568                            | 0.96 | 0.512                                      | 0.96 | 0.495        |
|             | rs2239802  | 32519824                   | G/C          | 0.23            | 0.20     | 0.52                            | 1.23 | $4 \times 10^{-4}$                   | 1.01 | 0.858                            | 1.04 | 0.634                                      | 0.99 | 0.873        |
|             | rs2076536  | 32447326                   | G/A          | 0.39            | 0.34     | $3 \times 10^{-4}$              | 1.19 | $5 \times 10^{-4}$                   | 1.02 | 0.805                            | 1.01 | 0.919                                      | 0.99 | 0.809        |
|             | rs2395182  | 32521295                   | G/T          | 0.23            | 0.20     | 0.49                            | 1.23 | $5 \times 10^{-4}$                   | 1.01 | 0.850                            | 1.04 | 0.626                                      | 0.99 | 0.881        |
|             | rs3134943  | 32255739                   | A/G          | 0.15            | 0.13     | 0.22                            | 1.27 | $5 \times 10^{-4}$                   | 1.11 | 0.159                            | 1.13 | 0.103                                      | 1.05 | 0.583        |
|             | rs3134603  | 32233980                   | T/C          | 0.15            | 0.13     | 0.84                            | 1.27 | $5 \times 10^{-4}$                   | 1.12 | 0.144                            | 1.14 | 0.090                                      | 1.05 | 0.551        |
|             | rs7196     | 32520549                   | A/T          | 0.23            | 0.20     | 0.46                            | 1.23 | $5 \times 10^{-4}$                   | 1.01 | 0.862                            | 1.04 | 0.637                                      | 0.99 | 0.873        |
|             | rs3131283  | 32227876                   | A/G          | 0.15            | 0.13     | 0.38                            | 1.27 | $5 \times 10^{-4}$                   | 1.11 | 0.167                            | 1.13 | 0.110                                      | 1.04 | 0.629        |
|             | rs9268522  | 32489421                   | T/A          | 0.20            | 0.24     | 0.07                            | 0.82 | $5 \times 10^{-4}$                   | 0.91 | 0.122                            | 0.90 | 0.088                                      | 0.89 | 0.073        |
|             | rs3130342  | 32188124                   | T/G          | 0.16            | 0.13     | 0.28                            | 1.26 | $5 \times 10^{-4}$                   | 1.11 | 0.148                            | 1.13 | 0.096                                      | 1.04 | 0.671        |
|             | rs2516417  | 31567615                   | C/G          | 0.31            | 0.34     | 0.07                            | 0.84 | $5 \times 10^{-4}$                   | 0.88 | <b>0.018</b>                     | 0.89 | <b>0.032</b>                               | 0.94 | 0.255        |
|             | rs3817973  | 32469089                   | A/G          | 0.40            | 0.44     | 0.60                            | 0.85 | $5 \times 10^{-4}$                   | 0.98 | 0.736                            | 0.98 | 0.698                                      | 0.97 | 0.584        |
|             | rs9268839  | 32536750                   | G/A          | 0.41            | 0.45     | 0.27                            | 0.85 | $6 \times 10^{-4}$                   | 0.96 | 0.473                            | 0.96 | 0.513                                      | 0.97 | 0.557        |
|             | rs2076530  | 32471794                   | G/A          | 0.41            | 0.45     | 0.60                            | 0.85 | $6 \times 10^{-4}$                   | 0.99 | 0.828                            | 0.98 | 0.776                                      | 0.97 | 0.655        |

|            |          |     |      |      |                    |      |                    |      |              |      |              |      |       |
|------------|----------|-----|------|------|--------------------|------|--------------------|------|--------------|------|--------------|------|-------|
| rs9270984  | 32681969 | T/G | 0.18 | 0.15 | 0.77               | 1.25 | 6x10 <sup>-4</sup> | 1.06 | 0.446        | 1.08 | 0.332        | 1.01 | 0.914 |
| rs3132940  | 32269374 | A/C | 0.15 | 0.13 | 0.50               | 1.27 | 6x10 <sup>-4</sup> | 1.10 | 0.218        | 1.12 | 0.142        | 1.03 | 0.691 |
| rs9271055  | 32683347 | G/A | 0.18 | 0.15 | 0.60               | 1.25 | 6x10 <sup>-4</sup> | 1.06 | 0.454        | 1.08 | 0.338        | 1.01 | 0.923 |
| rs3129750  | 32689493 | G/T | 0.18 | 0.15 | 0.60               | 1.25 | 6x10 <sup>-4</sup> | 1.06 | 0.454        | 1.08 | 0.338        | 1.01 | 0.923 |
| rs9378212  | 32553669 | T/C | 0.41 | 0.45 | 0.38               | 0.85 | 6x10 <sup>-4</sup> | 0.96 | 0.500        | 0.97 | 0.540        | 0.97 | 0.587 |
| rs9270986  | 32682038 | A/C | 0.18 | 0.15 | 0.73               | 1.25 | 6x10 <sup>-4</sup> | 1.06 | 0.453        | 1.07 | 0.337        | 1.01 | 0.922 |
| rs13211921 | 32550814 | G/T | 0.41 | 0.45 | 0.44               | 0.85 | 6x10 <sup>-4</sup> | 0.96 | 0.483        | 0.96 | 0.522        | 0.97 | 0.567 |
| rs1964995  | 32557389 | G/A | 0.41 | 0.45 | 0.38               | 0.85 | 7x10 <sup>-4</sup> | 0.96 | 0.490        | 0.97 | 0.529        | 0.97 | 0.575 |
| rs2844507  | 31544560 | A/G | 0.26 | 0.23 | 0.01               | 1.20 | 7x10 <sup>-4</sup> | 1.13 | <b>0.035</b> | 1.14 | <b>0.021</b> | 0.88 | 0.414 |
| rs2395037  | 31568279 | G/A | 0.38 | 0.42 | 0.43               | 0.85 | 7x10 <sup>-4</sup> | 0.90 | <b>0.028</b> | 0.90 | <b>0.047</b> | 0.96 | 0.435 |
| rs3129852  | 32505762 | G/A | 0.22 | 0.19 | 0.84               | 1.22 | 7x10 <sup>-4</sup> | 1.02 | 0.826        | 1.04 | 0.625        | 1.00 | 0.968 |
| rs9268633  | 32514451 | A/G | 0.22 | 0.19 | 0.84               | 1.22 | 7x10 <sup>-4</sup> | 1.02 | 0.826        | 1.04 | 0.625        | 1.00 | 0.968 |
| rs9394099  | 32557138 | T/G | 0.41 | 0.45 | 0.40               | 0.85 | 7x10 <sup>-4</sup> | 0.96 | 0.498        | 0.97 | 0.537        | 0.97 | 0.585 |
| rs3135334  | 32510664 | G/A | 0.22 | 0.19 | 0.84               | 1.22 | 7x10 <sup>-4</sup> | 1.02 | 0.824        | 1.04 | 0.631        | 1.00 | 0.966 |
| rs3132946  | 32298006 | A/G | 0.15 | 0.13 | 0.32               | 1.26 | 7x10 <sup>-4</sup> | 1.09 | 0.239        | 1.11 | 0.158        | 1.03 | 0.713 |
| rs4373382  | 32458846 | C/A | 0.40 | 0.45 | 0.56               | 0.85 | 7x10 <sup>-4</sup> | 0.99 | 0.808        | 0.98 | 0.770        | 0.97 | 0.654 |
| rs4424066  | 32462406 | G/A | 0.40 | 0.44 | 0.58               | 0.85 | 7x10 <sup>-4</sup> | 0.99 | 0.811        | 0.98 | 0.772        | 0.97 | 0.655 |
| rs1044506  | 32280043 | A/C | 0.15 | 0.13 | 0.55               | 1.26 | 7x10 <sup>-4</sup> | 1.09 | 0.236        | 1.11 | 0.155        | 1.03 | 0.713 |
| rs9268455  | 32457750 | T/C | 0.20 | 0.23 | 0.06               | 0.82 | 7x10 <sup>-4</sup> | 0.91 | 0.117        | 0.90 | 0.085        | 0.90 | 0.083 |
| rs9268451  | 32457064 | C/T | 0.20 | 0.23 | 0.07               | 0.82 | 8x10 <sup>-4</sup> | 0.91 | 0.116        | 0.90 | 0.085        | 0.90 | 0.083 |
| rs3793127  | 32479893 | A/C | 0.20 | 0.23 | 0.07               | 0.82 | 8x10 <sup>-4</sup> | 0.91 | 0.119        | 0.90 | 0.087        | 0.90 | 0.085 |
| rs3763309  | 32483951 | T/C | 0.20 | 0.23 | 0.07               | 0.82 | 8x10 <sup>-4</sup> | 0.91 | 0.119        | 0.90 | 0.087        | 0.90 | 0.085 |
| rs12055599 | 31720555 | C/A | 0.03 | 0.02 | 4x10 <sup>-4</sup> | 1.73 | 8x10 <sup>-4</sup> | 1.65 | <b>0.002</b> | 1.14 | 0.866        | 1.18 | 0.835 |
| rs2076533  | 32471505 | G/A | 0.40 | 0.44 | 0.60               | 0.85 | 8x10 <sup>-4</sup> | 0.99 | 0.829        | 0.98 | 0.791        | 0.98 | 0.673 |
| rs2076529  | 32471933 | A/G | 0.40 | 0.44 | 0.60               | 0.85 | 8x10 <sup>-4</sup> | 0.99 | 0.829        | 0.98 | 0.791        | 0.98 | 0.673 |
| rs9268472  | 32463583 | A/G | 0.40 | 0.44 | 0.56               | 0.85 | 8x10 <sup>-4</sup> | 0.99 | 0.820        | 0.98 | 0.781        | 0.97 | 0.663 |
| rs3131294  | 32288124 | T/C | 0.15 | 0.13 | 0.50               | 1.26 | 8x10 <sup>-4</sup> | 1.09 | 0.242        | 1.11 | 0.159        | 1.03 | 0.734 |
| rs3134749  | 31327448 | A/G | 0.41 | 0.45 | 0.38               | 0.85 | 8x10 <sup>-4</sup> | 0.90 | <b>0.025</b> | 0.89 | <b>0.021</b> | 0.93 | 0.150 |
| rs9268460  | 32459261 | C/T | 0.40 | 0.44 | 0.56               | 0.85 | 8x10 <sup>-4</sup> | 0.99 | 0.852        | 0.99 | 0.813        | 0.98 | 0.693 |
| rs1048709  | 32022914 | A/G | 0.20 | 0.17 | 0.41               | 1.23 | 8x10 <sup>-4</sup> | 1.11 | 0.091        | 1.13 | 0.054        | 1.06 | 0.409 |
| rs9268433  | 32453869 | G/T | 0.20 | 0.23 | 0.06               | 0.82 | 8x10 <sup>-4</sup> | 0.91 | 0.128        | 0.90 | 0.094        | 0.90 | 0.092 |
| rs2904592  | 31568035 | G/A | 0.38 | 0.42 | 0.45               | 0.85 | 9x10 <sup>-4</sup> | 0.90 | <b>0.035</b> | 0.91 | 0.057        | 0.96 | 0.507 |
| rs3129883  | 32518115 | T/C | 0.27 | 0.24 | 0.53               | 1.20 | 9x10 <sup>-4</sup> | 0.96 | 0.580        | 0.99 | 0.840        | 0.96 | 0.561 |
| rs3763312  | 32484326 | A/G | 0.20 | 0.23 | 0.06               | 0.82 | 9x10 <sup>-4</sup> | 0.91 | 0.129        | 0.90 | 0.095        | 0.90 | 0.093 |
| rs9271775  | 32702306 | C/T | 0.19 | 0.16 | 0.96               | 1.23 | 9x10 <sup>-4</sup> | 1.05 | 0.539        | 1.07 | 0.374        | 1.01 | 0.914 |
| rs1800684  | 32259972 | T/A | 0.15 | 0.13 | 0.25               | 1.26 | 9x10 <sup>-4</sup> | 1.10 | 0.228        | 1.11 | 0.154        | 1.02 | 0.780 |
| rs28570051 | 31318580 | T/C | 0.41 | 0.45 | 0.42               | 0.85 | 9x10 <sup>-4</sup> | 0.90 | <b>0.027</b> | 0.89 | <b>0.022</b> | 0.93 | 0.156 |
| rs3129886  | 32518554 | T/C | 0.27 | 0.24 | 0.53               | 1.20 | 9x10 <sup>-4</sup> | 0.96 | 0.551        | 0.98 | 0.806        | 0.95 | 0.532 |
| rs3763317  | 32484766 | T/C | 0.43 | 0.46 | 0.59               | 0.85 | 9x10 <sup>-4</sup> | 0.92 | 0.123        | 0.92 | 0.107        | 0.92 | 0.103 |
| rs3096695  | 32177784 | G/C | 0.15 | 0.13 | 0.21               | 1.25 | 9x10 <sup>-4</sup> | 1.10 | 0.195        | 1.12 | 0.132        | 1.03 | 0.745 |
| rs3130285  | 32134235 | T/C | 0.15 | 0.13 | 0.15               | 1.25 | 9x10 <sup>-4</sup> | 1.10 | 0.189        | 1.12 | 0.128        | 1.03 | 0.741 |
| rs28490179 | 32626983 | C/T | 0.18 | 0.15 | 0.03               | 1.23 | 0.001              | 1.04 | 0.559        | 1.06 | 0.427        | 1.00 | 0.949 |
| rs3095245  | 31321881 | G/A | 0.41 | 0.45 | 0.40               | 0.85 | 0.001              | 0.90 | <b>0.030</b> | 0.90 | <b>0.025</b> | 0.93 | 0.165 |
